# Supplementary material for: Yeast cell wall mannan rich fraction modulates bacterial cellular respiration potentiating antibiotic efficacy
Source: Springer Nature journal article supplement (doi:10.1038/s41598-020-78855-5), 2020-12-14
Supplement: 41598_2020_78855_MOESM1_ESM.pdf [file 41598_2020_78855_MOESM1_ESM.pdf]

## Supplementary Information (SI)

This file contains supplementary information for manuscript entitled “Yeast cell wall mannan rich fraction modulates bacterial cellular respiration potentiating antibiotic efficacy”.

Smith H.\*, Grant S., Parker J., Murphy, R.

Helen Smith\*

Email: [hsmith@alltech.com](mailto:hsmith@alltech.com)

### **This PDF file includes:**

Figures S1 to S3  
Tables S1 to S2  
SI References

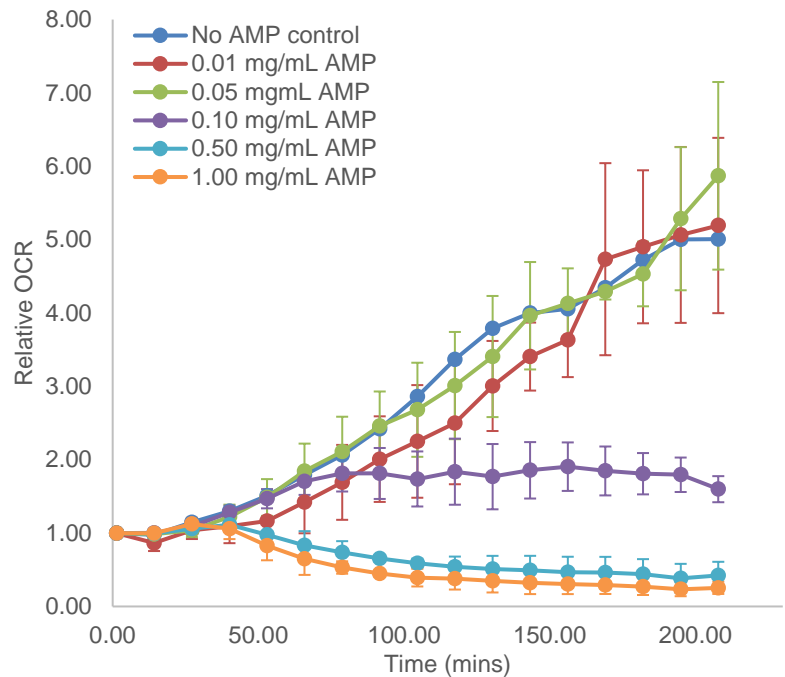

**Fig. S1a**

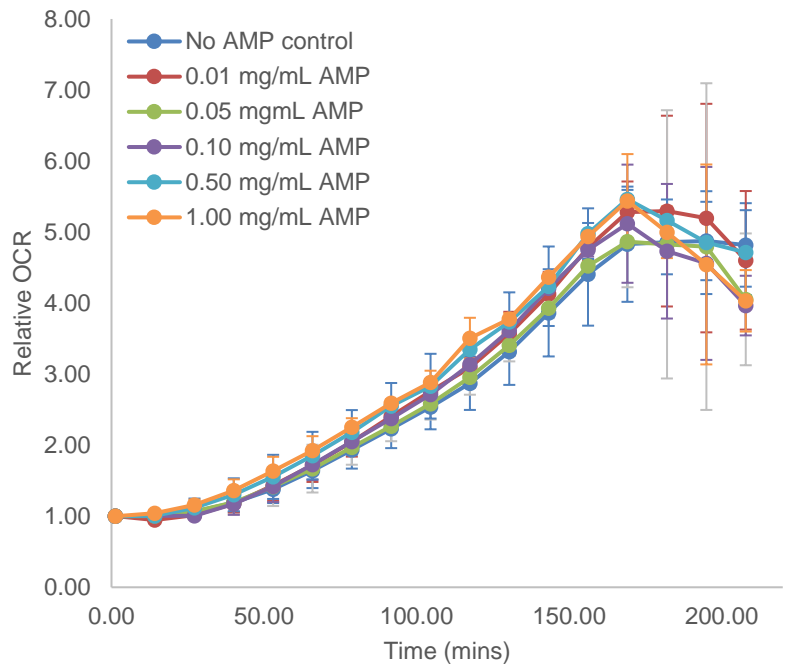

**Fig. S1b**

**Fig. S1. Effect of ampicillin on relative oxygen consumption rate (OCR) (pmol/min) of antibiotic susceptible and resistant *E. coli*.** Real-time changes in OCR of [a] antibiotic susceptible and [b] antibiotic resistant *E. coli* when treated with increasing concentrations of ampicillin (0.01 – 1.0 mg/mL). Each value was expressed using mean of triplicates for each biological replicate (n = 3), standard deviation is represented by error bars.

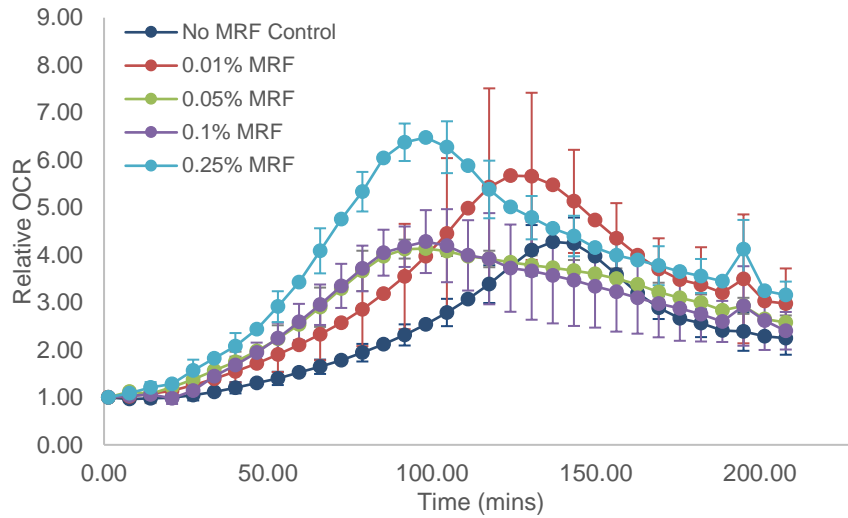

**Fig. S2a**

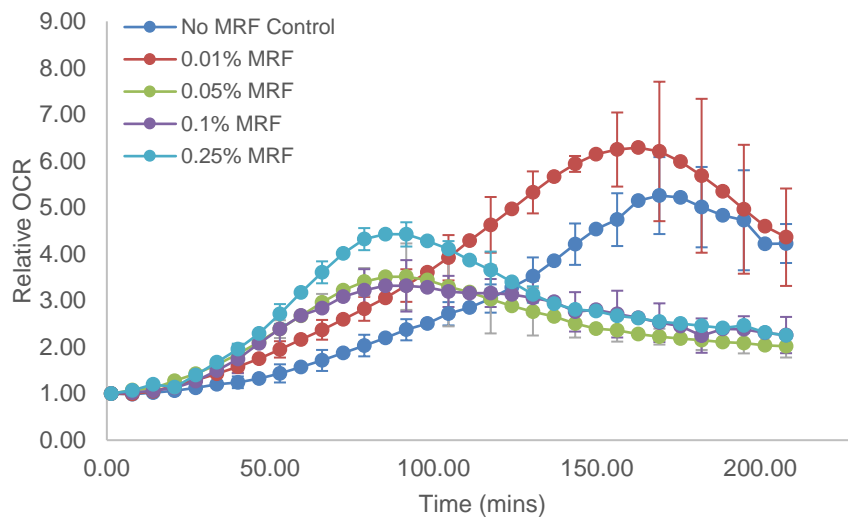

**Fig. S2b**

**Fig. S2. MRF supplementation (0.01 – 0.25%, w/v) potentiates bacterial cellular respiration.** Real-time changes in oxygen consumption rate (OCR) of **[a]** antibiotic susceptible and **[b]** antibiotic resistant *E. coli* when treated with increasing concentration of MRF (0.01 – 0.25 %, w/v). Each value was expressed using mean of triplicate values for each biological replicate (n = 3), standard deviation is represented by error bars.

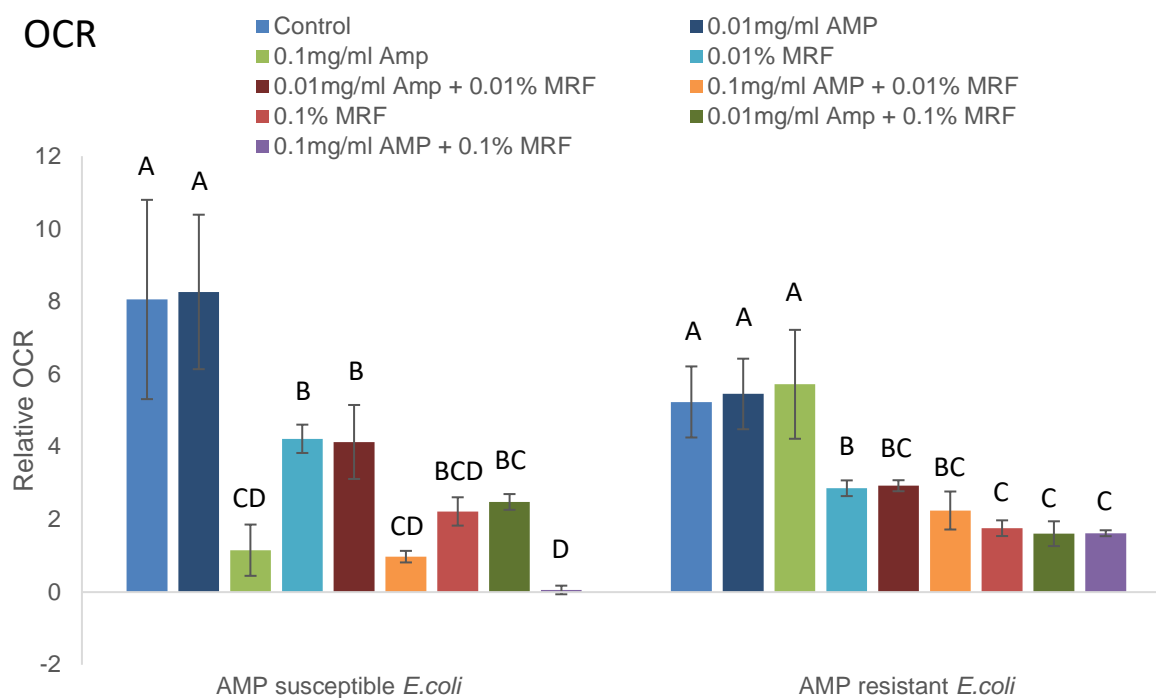

**Fig. S3a**

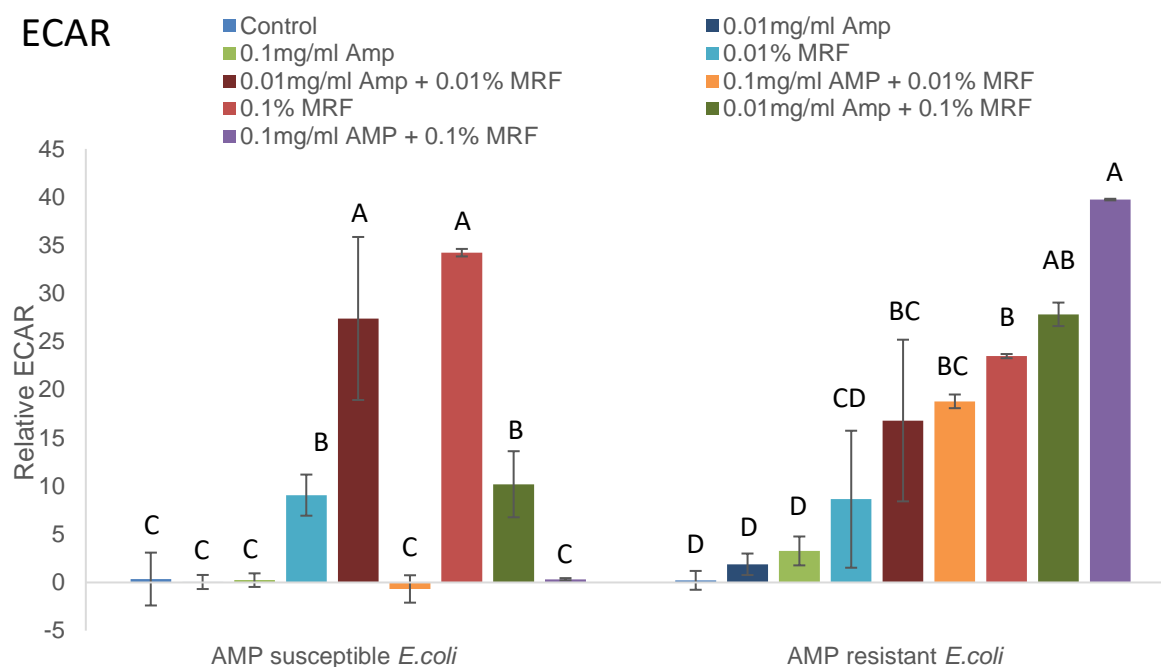

**Fig.S3b**

**Fig. S3. Relative oxygen consumption rate (OCR) (pmol/min) and extracellular acidification rate (ECAR) (mph/min) end-point status.** Comparison of [a] relative OCR (pmol/min) and [b] ECAR (mph/min) end-point measurements between antibiotic susceptible and resistant *E. coli* supplemented and not supplemented with MRF, treated and not treated with ampicillin. Each value was expressed using mean of triplicate values for each biological replicate (n = 3), standard deviation is represented by error bars. Means that do not share a letter are significantly different ( $p \leq 0.01$ , ANOVA, Fisher-LSD).

**Table S1. Growth curve data of antibiotic susceptible *E.coli* generated using GrowthRate software [1].**

|          | No AMP    | 0.01µgmL <sup>-1</sup>     | 0.1 µgmL <sup>-1</sup>     | 0.2 µgmL <sup>-1</sup>       | 0.5 µgmL <sup>-1</sup>      |                              |
|----------|-----------|----------------------------|----------------------------|------------------------------|-----------------------------|------------------------------|
| Rate     | No MRF    | 0.044 ± 0.000 <sup>a</sup> | 0.044 ± 0.000 <sup>a</sup> | 0.044 ± 0.000 <sup>a</sup>   | 0.042 ± 0.003 <sup>a</sup>  | 0.044 ± 0.000 <sup>a</sup>   |
|          | 0.1% MRF  | 0.038 ± 0.001 <sup>b</sup> | 0.039 ± 0.000 <sup>b</sup> | 0.038 ± 0.001 <sup>b</sup>   | 0.038 ± 0.000 <sup>b</sup>  | 0.039 ± 0.000 <sup>c</sup>   |
|          | 0.25% MRF | 0.039 ± 0.000 <sup>b</sup> | 0.039 ± 0.000 <sup>b</sup> | 0.039 ± 0.001 <sup>ab</sup>  | 0.039 ± 0.001 <sup>ab</sup> | 0.040 ± 0.000 <sup>bc*</sup> |
|          | 0.5% MRF  | 0.038 ± 0.003 <sup>b</sup> | 0.036 ± 0.001 <sup>c</sup> | 0.038 ± 0.005 <sup>b</sup>   | 0.041 ± 0.000 <sup>ab</sup> | 0.042 ± 0.002 <sup>b</sup>   |
| R        | No MRF    | 0.95 ± 0.005               | 0.94 ± 0.000               | 0.94 ± 0.005                 | 0.95 ± 0.012                | 0.94 ± 0.006                 |
|          | 0.1% MRF  | 0.94 ± 0.014               | 0.94 ± 0.014               | 0.94 ± 0.013                 | 0.95 ± 0.016                | 0.95 ± 0.001                 |
|          | 0.25% MRF | 0.92 ± 0.000               | 0.92 ± 0.004               | 0.93 ± 0.007                 | 0.93 ± 0.006                | 0.94 ± 0.005                 |
|          | 0.5% MRF  | 0.96 ± 0.003               | 0.96 ± 0.001               | 0.95 ± 0.024                 | 0.95 ± 0.008                | 0.94 ± 0.021                 |
| Lag Time | No MRF    | 133.63 ± 1.15 <sup>a</sup> | 132.30 ± 0.00 <sup>a</sup> | 132.63 ± 0.98 <sup>a</sup>   | 114.50 ± 31.35 <sup>a</sup> | 132.77 ± 1.27 <sup>a</sup>   |
|          | 0.1% MRF  | 73.10 ± 2.94 <sup>b</sup>  | 73.03 ± 2.89 <sup>c</sup>  | 73.07 ± 2.66 <sup>ab</sup>   | 75.87 ± 4.04 <sup>b</sup>   | 74.83 ± 0.23 <sup>b</sup>    |
|          | 0.25% MRF | 68.83 ± 0.06 <sup>b</sup>  | 68.47 ± 0.75 <sup>d</sup>  | 69.40 ± 1.39 <sup>b</sup>    | 70.77 ± 1.15 <sup>b*</sup>  | 70.90 ± 1.04 <sup>b*</sup>   |
|          | 0.5% MRF  | 97.60 ± 36.20 <sup>b</sup> | 76.23 ± 0.29 <sup>b</sup>  | 113.90 ± 64.26 <sup>ab</sup> | 133.73 ± 1.96 <sup>a</sup>  | 151.50 ± 30.66 <sup>a*</sup> |
| Max OD   | No MRF    | 0.404 ± 0.029 <sup>a</sup> | 0.391 ± 0.014 <sup>a</sup> | 0.383 ± 0.001 <sup>a</sup>   | 0.391 ± 0.013 <sup>a</sup>  | 0.341 ± 0.006 <sup>a*</sup>  |
|          | 0.1% MRF  | 0.317 ± 0.009 <sup>b</sup> | 0.328 ± 0.005 <sup>b</sup> | 0.317 ± 0.001 <sup>b</sup>   | 0.314 ± 0.008 <sup>b*</sup> | 0.284 ± 0.008 <sup>b*</sup>  |
|          | 0.25% MRF | 0.261 ± 0.023 <sup>c</sup> | 0.283 ± 0.021 <sup>c</sup> | 0.294 ± 0.003 <sup>c*</sup>  | 0.271 ± 0.015 <sup>c</sup>  | 0.245 ± 0.010 <sup>c*</sup>  |
|          | 0.5% MRF  | 0.141 ± 0.004 <sup>d</sup> | 0.151 ± 0.018 <sup>d</sup> | 0.136 ± 0.008 <sup>d</sup>   | 0.138 ± 0.001 <sup>d</sup>  | 0.114 ± 0.010 <sup>d*</sup>  |

GrowthRate software output (n = 3) for antibiotic susceptible *E. coli* treated with ampicillin, supplemented with and without MRF. Means per AMP concentration that do not share a letter are significantly different. Values marked with an asterisk [\*] are significantly different to the control 'No AMP' treatment group for the corresponding MRF concentration ( $p \leq 0.05$ , ANOVA, Fisher-LSD).

**Table S2. Growth curve data of antibiotic resistant *E.coli* generated using GrowthRate software [1].**

|          | No AMP    | 0.05µgmL <sup>-1</sup>      | 0.5 µgmL <sup>-1</sup>      | 5 µgmL <sup>-1</sup>        | 50 µgmL <sup>-1</sup>       |                             |
|----------|-----------|-----------------------------|-----------------------------|-----------------------------|-----------------------------|-----------------------------|
| Rate     | No MRF    | 0.042 ± 0.001 <sup>a</sup>  | 0.040 ± 0.003 <sup>a</sup>  | 0.042 ± 0.001 <sup>a</sup>  | 0.040 ± 0.003 <sup>a</sup>  | 0.040 ± 0.003 <sup>a</sup>  |
|          | 0.1% MRF  | 0.034 ± 0.001 <sup>b</sup>  | 0.034 ± 0.002 <sup>b</sup>  | 0.033 ± 0.004 <sup>b</sup>  | 0.035 ± 0.002 <sup>ab</sup> | 0.033 ± 0.004 <sup>b</sup>  |
|          | 0.25% MRF | 0.033 ± 0.004 <sup>b</sup>  | 0.034 ± 0.002 <sup>b</sup>  | 0.034 ± 0.002 <sup>b</sup>  | 0.034 ± 0.004 <sup>b</sup>  | 0.035 ± 0.003 <sup>ab</sup> |
|          | 0.5% MRF  | 0.036 ± 0.002 <sup>b</sup>  | 0.035 ± 0.001 <sup>b</sup>  | 0.034 ± 0.001 <sup>b</sup>  | 0.033 ± 0.002 <sup>b</sup>  | 0.036 ± 0.003 <sup>ab</sup> |
| R        | No MRF    | 0.95 ± 0.009                | 0.95 ± 0.006                | 0.95 ± 0.010                | 0.95 ± 0.008                | 0.95 ± 0.008                |
|          | 0.1% MRF  | 0.93 ± 0.008                | 0.95 ± 0.007                | 0.93 ± 0.024                | 0.93 ± 0.016                | 0.93 ± 0.015                |
|          | 0.25% MRF | 0.92 ± 0.017                | 0.91 ± 0.022                | 0.92 ± 0.014                | 0.92 ± 0.005                | 0.90 ± 0.034                |
|          | 0.5% MRF  | 0.90 ± 0.008                | 0.92 ± 0.006                | 0.92 ± 0.026                | 0.91 ± 0.047                | 0.93 ± 0.015                |
| Lag Time | No MRF    | 153.80 ± 34.10 <sup>a</sup> | 135.03 ± 58.51 <sup>a</sup> | 153.23 ± 34.52 <sup>a</sup> | 134.80 ± 57.95 <sup>a</sup> | 135.57 ± 57.85 <sup>a</sup> |
|          | 0.1% MRF  | 70.93 ± 1.62 <sup>b</sup>   | 73.73 ± 1.55 <sup>b</sup>   | 68.97 ± 6.69 <sup>b</sup>   | 69.63 ± 3.11 <sup>a</sup>   | 67.67 ± 4.92 <sup>a</sup>   |
|          | 0.25% MRF | 66.67 ± 5.60 <sup>b</sup>   | 66.60 ± 2.91 <sup>b</sup>   | 68.93 ± 2.27 <sup>b</sup>   | 66.30 ± 3.27 <sup>a</sup>   | 103.00 ± 58.90 <sup>a</sup> |
|          | 0.5% MRF  | 65.73 ± 0.75 <sup>b</sup>   | 68.83 ± 1.12 <sup>b</sup>   | 69.23 ± 4.83 <sup>b</sup>   | 103.33 ± 56.30 <sup>a</sup> | 130.90 ± 62.00 <sup>a</sup> |
| Max OD   | No MRF    | 0.361 ± 0.034 <sup>a</sup>  | 0.360 ± 0.039 <sup>a</sup>  | 0.350 ± 0.055 <sup>a</sup>  | 0.368 ± 0.045 <sup>a</sup>  | 0.370 ± 0.038 <sup>a</sup>  |
|          | 0.1% MRF  | 0.307 ± 0.069 <sup>ab</sup> | 0.296 ± 0.058 <sup>ab</sup> | 0.291 ± 0.052 <sup>ab</sup> | 0.292 ± 0.051 <sup>ab</sup> | 0.287 ± 0.047 <sup>b</sup>  |
|          | 0.25% MRF | 0.267 ± 0.045 <sup>bc</sup> | 0.268 ± 0.047 <sup>bc</sup> | 0.260 ± 0.044 <sup>b</sup>  | 0.253 ± 0.044 <sup>ab</sup> | 0.244 ± 0.046 <sup>b</sup>  |
|          | 0.5% MRF  | 0.201 ± 0.038 <sup>c</sup>  | 0.184 ± 0.042 <sup>c</sup>  | 0.153 ± 0.028 <sup>c</sup>  | 0.128 ± 0.019 <sup>c*</sup> | 0.104 ± 0.032 <sup>c*</sup> |

GrowthRate software output (n = 3) for antibiotic resistant *E. coli* treated with ampicillin, supplemented with and without MRF. Means per AMP concentration that do not share a letter are significantly different. Values marked with an asterisk [\*] are significantly different to the control 'No AMP' treatment group for the corresponding MRF concentration ( $p \leq 0.05$ , ANOVA, Fisher-LSD).

### SI References

1 Hall, B.G., *et al.* Growth rates made easy. *Mol Biol Evol.* **31**, 232-238 (2014).
